# Supplementary material for: Prediction of three lipid derivatives for postoperative gastric cancer mortality: the Fujian prospective investigation of cancer (FIESTA) study
Source: PubMed Central journal article supplement (PMC6080391; doi:10.1186/s12885-018-4596-y), 2018-08-06

# Figure S1

(A)

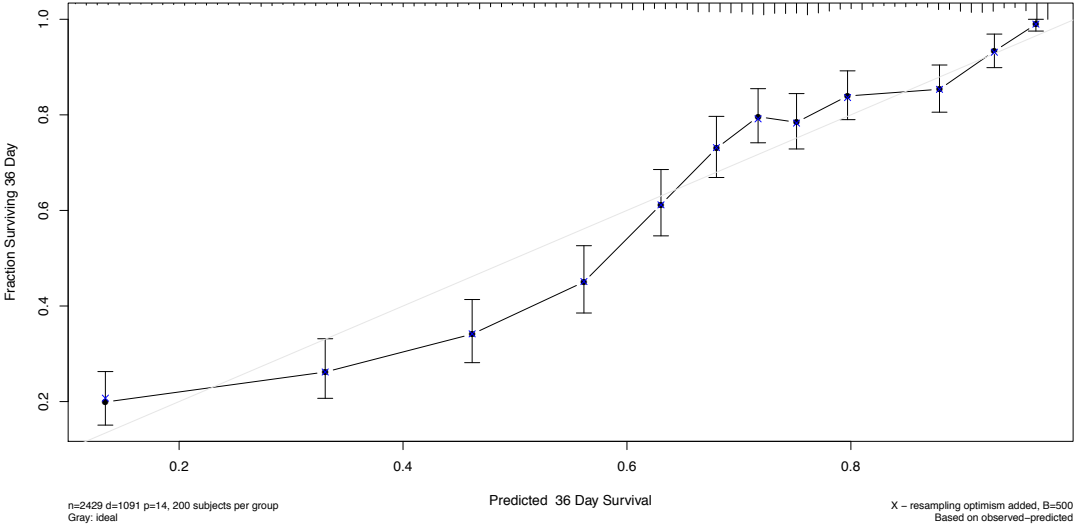

(B)

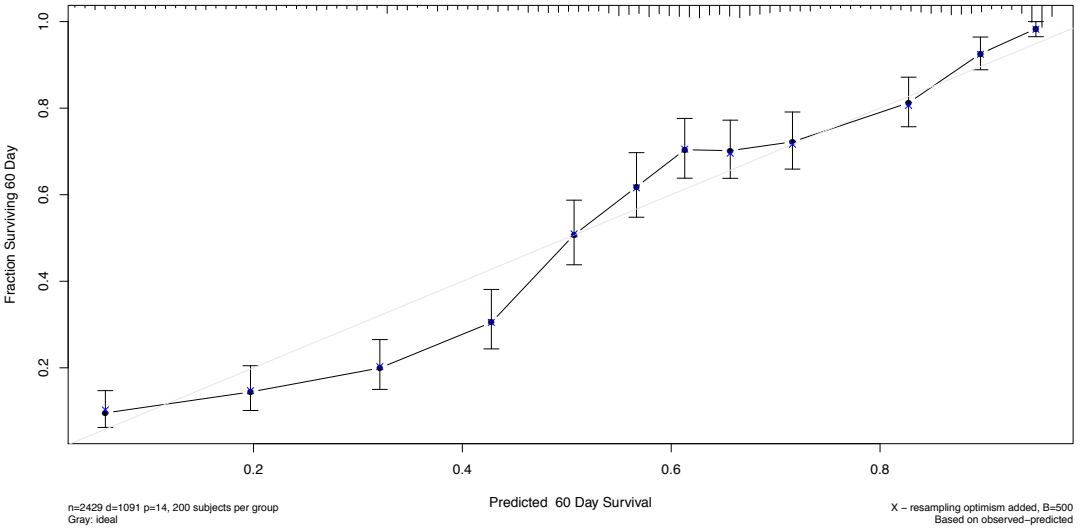

(C)

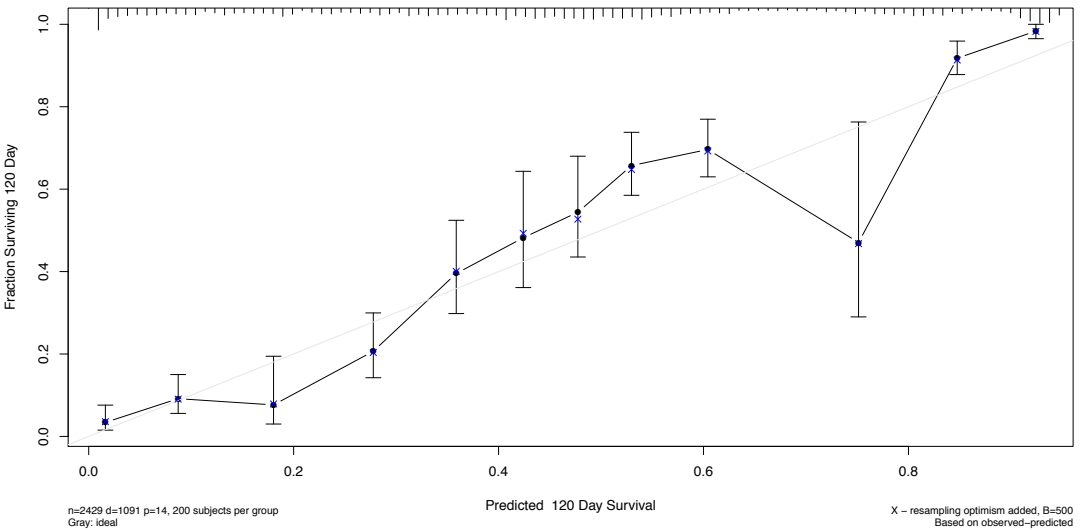

Supplement: 12885_2018_4596_MOESM1_ESM.pdf [file 12885_2018_4596_MOESM1_ESM.pdf]
